# Supplementary material for: A fluoride-responsive genetic circuit enables in vivo biofluorination in engineered Pseudomonas putida
Source: PubMed Central journal article supplement (PMC7541441; doi:10.1038/s41467-020-18813-x), 2020-10-07
Supplement: 41467_2020_18813_MOESM4_ESM.pdf [file 41467_2020_18813_MOESM4_ESM.pdf]

## Description of Additional Supplementary Files

File name: Supplementary Data 1

Description: DNA sequences of the fluoride-dependent riboswitches used in this study
